# Supplementary material
Source: publisher site journal article supplement (https://kjim.org/upload/media/kjim-2025-362-Supplementary-Table-1.pdf)
Supplement: Supplementary file 1 [file kjim-2025-362-Supplementary-Table-1.pdf]

**Supplementary Table 1. Baseline characteristics according to the categories of muscle mass changes in men (n = 24,623)**

| Variable                           | Muscle mass change ( $\Delta$ ) (kg) |                              |                                               |                              |                                               | $\rho$ for trend             |                              |
|------------------------------------|--------------------------------------|------------------------------|-----------------------------------------------|------------------------------|-----------------------------------------------|------------------------------|------------------------------|
|                                    | Overall                              | $\Delta \geq 2.5$            | $\Delta$ increased<br>$2.5 > \Delta \geq 1.5$ | None                         | $\Delta$ decreased<br>$1.5 \leq \Delta < 2.5$ |                              | $2.5 \leq \Delta$            |
| Number                             | 24,623                               | 520 (2.11)                   | 1,491 (6.06)                                  | 6,550 (26.6)                 | 6,449 (26.19)                                 | 3,810 (15.47)                | 1,959 (7.96)                 |
| Serum uric acid (mg/dL)            | 6.25 $\pm$ 1.21                      | 6.23 $\pm$ 1.36              | 6.31 $\pm$ 1.22                               | 6.22 $\pm$ 1.20              | 6.24 $\pm$ 1.19                               | 6.25 $\pm$ 1.22              | 6.38 $\pm$ 1.21              |
| Normouricemia                      | 18,202 (73.92)                       | 382 (73.46)                  | 1,084 (72.70)                                 | 4,866 (74.29)                | 4,822 (74.77)                                 | 2,806 (73.65)                | 1,366 (69.73)                |
| Hyperuricemia                      | 6,421 (26.08)                        | 138 (26.54)                  | 407 (27.30)                                   | 1,684 (25.71)                | 1,627 (25.23)                                 | 1,004 (26.35)                | 593 (30.27)                  |
| Age (yr)                           | 38.58 $\pm$ 6.49                     | 38.19 $\pm$ 6.27             | 38.80 $\pm$ 6.48                              | 38.95 $\pm$ 6.59             | 38.83 $\pm$ 6.42                              | 37.98 $\pm$ 6.38             | 36.65 $\pm$ 6.27             |
| BMI (kg/m <sup>2</sup> )           | 24.76 $\pm$ 2.76                     | 25.96 $\pm$ 2.90             | 25.39 $\pm$ 2.80                              | 24.94 $\pm$ 2.72             | 24.72 $\pm$ 2.70                              | 24.54 $\pm$ 2.74             | 24.76 $\pm$ 3.01             |
| Obesity                            | 10,532 (42.77)                       | 311 (59.81)                  | 781 (52.38)                                   | 2,795 (42.67)                | 2,609 (40.46)                                 | 1,462 (38.37)                | 809 (41.30)                  |
| SMI (%)                            | 43.04 $\pm$ 2.93                     | 43.36 $\pm$ 3.38             | 43.17 $\pm$ 2.93                              | 43.1 $\pm$ 2.92              | 43.03 $\pm$ 2.85                              | 42.91 $\pm$ 2.94             | 42.69 $\pm$ 3.09             |
| FMI (%)                            | 23.70 $\pm$ 5.07                     | 23.36 $\pm$ 5.62             | 23.60 $\pm$ 5.10                              | 23.5 $\pm$ 5.00              | 23.69 $\pm$ 4.95                              | 23.89 $\pm$ 5.10             | 24.32 $\pm$ 5.38             |
| WHR                                | 0.89 $\pm$ 0.04                      | 0.89 $\pm$ 0.05              | 0.90 $\pm$ 0.04                               | 0.89 $\pm$ 0.04              | 0.89 $\pm$ 0.04                               | 0.89 $\pm$ 0.04              | 0.89 $\pm$ 0.04              |
| SBP (mmHg)                         | 113.93 $\pm$ 10.41                   | 116.49 $\pm$ 10.76           | 114.79 $\pm$ 10.73                            | 114.28 $\pm$ 10.56           | 113.66 $\pm$ 10.41                            | 113.79 $\pm$ 10.39           | 114.15 $\pm$ 10.22           |
| HEPA                               | 3,769 (15.31)                        | 103 (19.81)                  | 260 (17.44)                                   | 599 (15.59)                  | 1,008 (15.39)                                 | 512 (13.44)                  | 300 (15.31)                  |
| Alcohol intake (g)                 | 10 [4-23]                            | 11 [4-25]                    | 10 [4-25]                                     | 10 [4-24]                    | 10 [4-21]                                     | 10 [4-21]                    | 10 [4-23]                    |
| Current smoker                     | 6,166 (25.10)                        | 149 (28.71)                  | 407 (27.37)                                   | 961 (25.06)                  | 1,568 (24.36)                                 | 965 (25.38)                  | 509 (26.01)                  |
| Highest education                  | 21,878 (88.85)                       | 453 (87.12)                  | 1,321 (88.60)                                 | 3,413 (88.79)                | 5,829 (88.99)                                 | 3,397 (89.16)                | 1,757 (89.69)                |
| Calcium (mg/dL)                    | 9.59 $\pm$ 0.29                      | 9.52 $\pm$ 0.30              | 9.52 $\pm$ 0.29                               | 9.56 $\pm$ 0.29              | 9.58 $\pm$ 0.29                               | 9.63 $\pm$ 0.28              | 9.67 $\pm$ 0.29              |
| Phosphorus (mg/dL)                 | 3.50 $\pm$ 0.42                      | 3.44 $\pm$ 0.43              | 3.47 $\pm$ 0.43                               | 3.49 $\pm$ 0.42              | 3.48 $\pm$ 0.41                               | 3.52 $\pm$ 0.43              | 3.56 $\pm$ 0.42              |
| ALP (md/dL)                        | 61.62 $\pm$ 14.23                    | 61.03 $\pm$ 14.71            | 61.24 $\pm$ 14.48                             | 61.25 $\pm$ 13.89            | 61.14 $\pm$ 13.93                             | 61.94 $\pm$ 14.54            | 63.01 $\pm$ 14.92            |
| LDL-C (mg/dL)                      | 133.31 $\pm$ 30.67                   | 132.06 $\pm$ 30.31           | 131.62 $\pm$ 31.64                            | 132.3 $\pm$ 30.00            | 133.14 $\pm$ 30.33                            | 134.01 $\pm$ 30.53           | 133.57 $\pm$ 30.92           |
| eGFR (mL/min/1.73 m <sup>2</sup> ) | 98.31 $\pm$ 14.73                    | 99.24 $\pm$ 14.71            | 99.48 $\pm$ 15.85                             | 98.62 $\pm$ 14.50            | 98.63 $\pm$ 14.82                             | 97.94 $\pm$ 14.48            | 97.61 $\pm$ 14.65            |
| hs-CRP (mg/dL)                     | 0.05 [0.03-0.10]                     | 0.06 [0.03-0.11]             | 0.05 [0.03-0.11]                              | 0.05 [0.03-0.10]             | 0.05 [0.03-0.10]                              | 0.05 [0.03-0.10]             | 0.06 [0.03-0.11]             |
| HOMA-IR (%)                        | 1.66 $\pm$ 1.07                      | 2.21 $\pm$ 1.47              | 1.89 $\pm$ 1.28                               | 1.75 $\pm$ 1.10              | 1.66 $\pm$ 1.05                               | 1.53 $\pm$ 0.98              | 1.58 $\pm$ 1.06              |
| Energy intake (kcal)               | 1,429.5<br>[1,097.6-1,802.6]         | 1,448.4<br>[1,132.2-1,892.1] | 1,449.1<br>[1,116.2-1,827.0]                  | 1,433.7<br>[1,113.2-1,808.8] | 1,429.1<br>[1,099.0-1,790.3]                  | 1,428.9<br>[1,107.7-1,813.2] | 1,436.9<br>[1,081.8-1,832.1] |
| Total protein (g)                  | 7.40 $\pm$ 0.35                      | 7.30 $\pm$ 0.35              | 7.30 $\pm$ 0.33                               | 7.34 $\pm$ 0.35              | 7.37 $\pm$ 0.34                               | 7.41 $\pm$ 0.34              | 7.52 $\pm$ 0.37              |
| Calcium intake (mg)                | 240.2<br>[151.6-358.6]               | 252.8<br>[151.4-368.4]       | 249.2<br>[161.8-372.6]                        | 243.9<br>[155.9-357.7]       | 237.5<br>[151.6-354.5]                        | 238.4<br>[149.2-355.8]       | 244.1<br>[150.8-366.2]       |
| Vitamin C intake (mg)              | 45.9<br>[25.1-75.6]                  | 51.0<br>[25.1-79.2]          | 47.1<br>[25.3-80.3]                           | 47.3<br>[26.1-76.8]          | 45.3<br>[25.4-74.2]                           | 45.8<br>[25.0-76.6]          | 45.2<br>[23.0-75.5]          |

Supplementary Table 1. Continued

| Variable             | Muscle mass change ( $\Delta$ ) (kg) |                     |                                               |                                 |                                               | $\rho$ for trend    |                         |                   |
|----------------------|--------------------------------------|---------------------|-----------------------------------------------|---------------------------------|-----------------------------------------------|---------------------|-------------------------|-------------------|
|                      | Overall                              | $\Delta \geq 2.5$   | $\Delta$ increased<br>$2.5 > \Delta \geq 1.5$ | None<br>$1.5 > \Delta \geq 0.5$ | $\Delta$ decreased<br>$0.5 \leq \Delta < 1.5$ |                     | $1.5 \leq \Delta < 2.5$ | $2.5 \leq \Delta$ |
| Total fat intake (g) | 27.3<br>[18.0–40.4]                  | 29.3<br>[18.8–42.7] | 28.2<br>[18.2–42.5]                           | 27.1<br>[17.7–39.5]             | 26.8<br>[17.9–40.1]                           | 27.3<br>[18.2–40.7] | 28.7<br>[18.9–43.0]     | 0.033             |
| Fiber intake (g)     | 2.8 [1.9–4.1]                        | 2.9 [1.9–4.2]       | 2.9 [1.9–4.3]                                 | 2.9 [2.0–4.2]                   | 2.8 [1.9–4.0]                                 | 2.8 [1.8–4.1]       | 2.8 [1.8–4.0]           | 0.003             |

Values are presented as number (%), mean  $\pm$  standard deviation, or median [interquartile range].

BMI, body mass index; SMI, skeletal muscle mass index; FMI, fat mass index; WHR, waist-to-hip ratio; SBP, systolic blood pressure; HEPA, health-enhancing physical activity; ALP, alkaline phosphatase; LDL-C, low-density lipoprotein cholesterol; eGFR, estimated glomerular filtration rate; hs-CRP, high sensitivity C-reactive protein; HOMA-IR, homeostasis model assessment of insulin resistance.
